# Supplementary material for: “Unhealthy = Tasty”: How Does It Affect Consumers’ (Un)Healthy Food Expectations?
Source: MDPI journal article supplement (doi:10.3390/foods11193139), 2022-10-09
Supplement: s1 [file s1]

## Section S1

### The experimental design of the online survey

Six research groups (R1 – R6) were composed to explore the effect of package labelling (No FoP / FoP) using interventions (No intervention / Intervention 1 / Intervention 2). The number of participants in the different research groups varied from 250 to 262.

|                                                |                                               |                                               |
|------------------------------------------------|-----------------------------------------------|-----------------------------------------------|
| <b>R1.</b> No intervention + No FoP<br>N = 262 | <b>R3.</b> Intervention 1 + No FoP<br>N = 253 | <b>R5.</b> Intervention 2 + No FoP<br>N = 257 |
| <b>R2.</b> No intervention + FoP<br>N = 257    | <b>R4.</b> Intervention 1 + FoP<br>N = 250    | <b>R6.</b> Intervention 2 + FoP<br>N = 258    |

FoP: Front of Package label (Heart Symbol) included on the package

Intervention 1: sensory imagery (guided instructions at the beginning of the survey)

Intervention 2: decentering (guided instructions at the beginning of the survey)

### The participants:

- To study the strength of Unhealthy = Tasty (UT) belief and the relationship between UT belief and other attitudes (General Health Interest; Food pleasure orientation) and demographic factors (gender, age, body mass index, education), all the research groups (R1 - R6) were involved (N = 1537)  
→ Study A
- To study the effect of UT belief on expected food experiences (tastiness, healthiness, purchase intention, nutrient content, emotions), the research group R1 with no intervention and no FoP was involved (N = 262)  
→ Study B

## Section S2

### The on-line survey questionnaire

#### Part 1. Expectations of the new food products

Look at the product image below for as long as you wish. Then answer the questions using a scale of 1 to 7 (1 = strongly disagree and 7 = strongly agree)

[In the surveys, the order was randomized]

1. I expect this product to taste excellent.
2. I expect that eating this product will be a pleasant experience.

[statements 1 – 2 represented expected tastiness]

3. I expect, that tasting and eating this product...
  - a. ... calms and reassures me
  - b. ... bores me, does not interest me
  - c. ... satisfies me
  - d. ... makes me associate it with happy memories of childhood
  - e. ... makes me feel guilt
  - f. ... disgusts me
  - g. ... makes me feel active and full of energy

[statements 3a – 3g represented expected emotions associated with the product]

4. In my opinion this product contains a lot of energy.
5. In my opinion this product contains a lot of fat.
6. In my opinion this product contains a lot of salt.
7. In my opinion this product contains a lot of protein.

[statements 4 – 7 represented expected nutrient content]

8. Consuming this product will help me stay fit.
9. In my opinion this product is healthy.
10. This product will help me stay slim.

[statements 8 – 10 represented expected healthiness]

11. I will buy this product (in the future)
12. I prefer this product to other ready-to-eat foods.
13. Next time I buy ready-to-eat foods, I will choose this product.

[statements 11 – 13 represented purchase intention]

## **Part 2. What kind of food consumer you are?**

Using a scale of 1-7 indicate to what extent you agree with following claims.  
(scale 1-7: 1 = strongly disagree; 7 = strongly agree)

[In the survey the claims were randomized]

1. Things that are good for me rarely taste good
2. There is no possibility of making food healthier without sacrificing taste
3. Healthy food is usually less tasty

[statements 1 – 3 represented Unhealthy = Tasty belief]

4. Enjoying food is one of the most important pleasure in my life.
5. I would rather eat my favorite meal than watch my favorite television show.
6. I often think about food in a positive anticipatory way
7. Money spent on food is money well spent
8. I have fond memories of family food occasions
9. If I could satisfy my nutritional needs safely, cheaply and without hunger by taking dietary supplements, I would. (Reversed)

[statements 4 – 9 represented Food pleasure orientation]

10. I am very particular about the healthiness of the food I eat.
11. It is important for me that my diet is low in fat.
12. I always follow a healthy and balanced diet.
13. It is important for me that my daily diet contains a lot of vitamins and minerals.
14. The healthiness of food has little impact on my food choices. (Reversed)
15. I eat what I like and I do not worry much about the healthiness of food. (Reversed)
16. The healthiness of snacks makes no difference to me. (Reversed)
17. I do not avoid foods, even if they may raise my cholesterol. (Reversed)

[statements 10 – 17 represented General health interest (GHI)]

### Part 3. Background information

Gender

- ☐ Woman
- ☐ Man
- ☐ Other

Year of birth

What is the highest level of education you have completed?

- ☐ No education
- ☐ Comprehensive school
- ☐ High school/vocational education
- ☐ Bachelor degree
- ☐ Master degree
- ☐ Licentiate or doctoral degree

[No education, Comprehensive school, and High school/vocational education represent 'no academic degree'; Bachelor, Master, and Licentiate or doctoral degree represent an 'academic degree']

What is your height (cm)?

What is your weight (kg)?

[Reported height and weight values were used to calculate Body Mass Index (BMI) =  $\text{kg/m}^2$  where kg is a person's weight in kilograms and  $\text{m}^2$  is their height in meters squared.]

### Section S3

**The results of the linear regression analyses. The prediction of the expected attributes of the unhealthy product: fried potatoes and sausages (n = 262).**

**Table S1.** The results of the linear regression analyses. The prediction of the expected tastiness, healthiness, and purchase intention of the unhealthy product (fried potatoes and sausages) by the factors: UT belief, GHI, Food pleasure orientation, gender, age, BMI, and education (n = 262).

| Expected                             | Unstandardized | Standardized |         | 95.0% Confidence Interval for $\beta$ |             |
|--------------------------------------|----------------|--------------|---------|---------------------------------------|-------------|
| tastiness_1                          | $\beta$        | $\beta$      | Sig.    | Lower bound                           | Upper Bound |
| (Constant)                           | 1.716          |              | 0.039   | 0.090                                 | 3.342       |
| UT belief                            | 0.196          | 0.167 **     | 0.007   | 0.053                                 | 0.339       |
| GHI                                  | -0.191         | -0.123       | 0.051   | -0.384                                | 0.001       |
| Food pleasure orientation            | 0.391          | 0.228 ***    | < 0.001 | 0.199                                 | 0.584       |
| Gender (0=female; 1=male)            | 0.781          | 0.228 ***    | < 0.001 | 0.392                                 | 1.170       |
| Age (years)                          | 0.004          | 0.039        | 0.522   | -0.009                                | 0.018       |
| BMI (kg/m <sup>2</sup> )             | 0.021          | 0.072        | 0.224   | -0.013                                | 0.055       |
| Education (0=no; 1= academic degree) | -0.350         | -0.102       | 0.079   | -0.741                                | 0.041       |

Model:  $R^2 = 0.203$ , Adjusted  $R^2 = 0.180$ . \*  $p < 0.050$ , \*\*  $p < 0.010$ , \*\*\*  $p < 0.001$ .

| Expected                             | Unstandardized | Standardized |         | 95.0% Confidence Interval for $\beta$ |             |
|--------------------------------------|----------------|--------------|---------|---------------------------------------|-------------|
| healthiness_1                        | $\beta$        | $\beta$      | Sig.    | Lower bound                           | Upper Bound |
| (Constant)                           | 0.464          |              | 0.482   | -0.835                                | 1.763       |
| UT belief                            | 0.156          | 0.171 **     | 0.008   | 0.042                                 | 0.270       |
| GHI                                  | 0.061          | 0.050        | 0.438   | -0.093                                | 0.214       |
| Food pleasure orientation            | 0.224          | 0.168 **     | 0.005   | 0.070                                 | 0.378       |
| Gender (0=female; 1=male)            | 0.756          | 0.284 ***    | < 0.001 | 0.445                                 | 1.068       |
| Age (years)                          | 0.004          | 0.046        | 0.458   | -0.007                                | 0.015       |
| BMI (kg/m <sup>2</sup> )             | -0.013         | -0.056       | 0.354   | -0.040                                | 0.014       |
| Education (0=no; 1= academic degree) | -0.177         | -0.066       | 0.267   | -0.489                                | 0.136       |

Model:  $R^2 = 0.158$ , Adjusted  $R^2 = 0.134$ . \*  $p < 0.050$ , \*\*  $p < 0.010$ , \*\*\*  $p < 0.001$ .

| Expected                             | Unstandardized | Standardized |         | 95.0% Confidence Interval for $\beta$ |             |
|--------------------------------------|----------------|--------------|---------|---------------------------------------|-------------|
| purchase intention_1                 | $\beta$        | $\beta$      | Sig.    | Lower bound                           | Upper Bound |
| (Constant)                           | 1.294          |              | 0.098   | -0.240                                | 2.827       |
| UT belief                            | 0.212          | 0.188 **     | 0.002   | 0.077                                 | 0.347       |
| GHI                                  | -0.198         | -0.133 *     | 0.033   | -0.380                                | -0.017      |
| Food pleasure orientation            | 0.332          | 0.201 ***    | < 0.001 | 0.151                                 | 0.514       |
| Gender (0=female; 1=male)            | 0.968          | 0.294 ***    | < 0.001 | 0.601                                 | 1.335       |
| Age (years)                          | -0.005         | -0.041       | 0.483   | -0.018                                | 0.008       |
| BMI (kg/m <sup>2</sup> )             | 0.012          | 0.041        | 0.479   | -0.021                                | 0.044       |
| Education (0=no; 1= academic degree) | -0.154         | -0.047       | 0.411   | -0.524                                | 0.215       |

Model:  $R^2 = 0.232$ , Adjusted  $R^2 = 0.210$ . \*  $p < 0.050$ , \*\*  $p < 0.010$ , \*\*\*  $p < 0.001$ .

**Table S2.** The results of the linear regression analyses. The prediction of the expected nutrient contents of the unhealthy product (fried potatoes and sausages) by the factors: UT belief, GHI, Food pleasure orientation, gender, age, BMI, and education (n = 262).

| Expected<br>energy content_1         | Unstandardized | Standardized | Sig.    | 95.0% Confidence Interval for $\beta$ |             |
|--------------------------------------|----------------|--------------|---------|---------------------------------------|-------------|
|                                      | $\beta$        | $\beta$      |         | Lower bound                           | Upper Bound |
| (Constant)                           | 2.430          |              | 0.001   | 0.990                                 | 3.870       |
| UT belief                            | 0.009          | 0.009        | 0.890   | - 0.118                               | 0.136       |
| GHI                                  | - 0.001        | - 0.001      | 0.987   | - 0.172                               | 0.169       |
| Food pleasure orientation            | 0.463          | 0.316 ***    | < 0.001 | 0.293                                 | 0.634       |
| Gender (0=female; 1=male)            | - 0.204        | - 0.070      | 0.245   | - 0.549                               | 0.141       |
| Age (years)                          | 0.010          | 0.104        | 0.098   | - 0.002                               | 0.022       |
| BMI (kg/m <sup>2</sup> )             | 0.011          | 0.043        | 0.480   | - 0.019                               | 0.041       |
| Education (0=no; 1= academic degree) | 0.245          | 0.084        | 0.164   | - 0.101                               | 0.592       |

Model:  $R^2 = 0.142$ , Adjusted  $R^2 = 0.118$ . \*  $p < 0.050$ , \*\*  $p < 0.010$ , \*\*\*  $p < 0.001$ .

| Expected<br>fat content_1            | Unstandardized | Standardized | Sig.    | 95.0% Confidence Interval for $\beta$ |             |
|--------------------------------------|----------------|--------------|---------|---------------------------------------|-------------|
|                                      | $\beta$        | $\beta$      |         | Lower bound                           | Upper Bound |
| (Constant)                           | 4.615          |              | < 0.001 | 3.398                                 | 5.833       |
| UT belief                            | 0.017          | 0.021        | 0.757   | - 0.090                               | 0.124       |
| GHI                                  | 0.133          | 0.124        | 0.069   | - 0.011                               | 0.278       |
| Food pleasure orientation            | 0.079          | 0.066        | 0.284   | - 0.066                               | 0.223       |
| Gender (0=female; 1=male)            | - 0.387        | - 0.163 *    | 0.010   | - 0.678                               | - 0.095     |
| Age (years)                          | - 0.001        | - 0.008      | 0.899   | - 0.011                               | 0.010       |
| BMI (kg/m <sup>2</sup> )             | 0.011          | 0.055        | 0.392   | - 0.014                               | 0.037       |
| Education (0=no; 1= academic degree) | 0.224          | 0.094        | 0.133   | - 0.069                               | 0.517       |

Model:  $R^2 = 0.070$ , Adjusted  $R^2 = 0.044$ . \*  $p < 0.050$ , \*\*  $p < 0.010$ , \*\*\*  $p < 0.001$ .

| Expected<br>salt content_1           | Unstandardized | Standardized | Sig.    | 95.0% Confidence Interval for $\beta$ |             |
|--------------------------------------|----------------|--------------|---------|---------------------------------------|-------------|
|                                      | $\beta$        | $\beta$      |         | Lower bound                           | Upper Bound |
| (Constant)                           | 4.211          |              | < 0.001 | 2.951                                 | 5.471       |
| UT belief                            | 0.007          | 0.009        | 0.896   | - 0.104                               | 0.118       |
| GHI                                  | 0.140          | 0.124        | 0.065   | - 0.009                               | 0.289       |
| Food pleasure orientation            | 0.089          | 0.071        | 0.242   | - 0.060                               | 0.238       |
| Gender (0=female; 1=male)            | - 0.351        | - 0.141 *    | 0.023   | - 0.653                               | - 0.049     |
| Age (years)                          | 0.001          | 0.012        | 0.854   | - 0.010                               | 0.012       |
| BMI (kg/m <sup>2</sup> )             | 0.009          | 0.040        | 0.521   | - 0.018                               | 0.035       |
| Education (0=no; 1= academic degree) | 0.456          | 0.182 **     | 0.003   | 0.153                                 | 0.759       |

Model:  $R^2 = 0.098$ , Adjusted  $R^2 = 0.073$ . \*  $p < 0.050$ , \*\*  $p < 0.010$ , \*\*\*  $p < 0.001$ .

| Expected<br>protein content_1        | Unstandardized | Standardized | Sig.    | 95.0% Confidence Interval for $\beta$ |             |
|--------------------------------------|----------------|--------------|---------|---------------------------------------|-------------|
|                                      | $\beta$        | $\beta$      |         | Lower bound                           | Upper Bound |
| (Constant)                           | 1.343          |              | 0.050   | - 0.001                               | 2.688       |
| UT belief                            | 0.166          | 0.179 **     | 0.006   | 0.047                                 | 0.284       |
| GHI                                  | 0.103          | 0.084        | 0.202   | - 0.056                               | 0.262       |
| Food pleasure orientation            | 0.199          | 0.147 *      | 0.014   | 0.040                                 | 0.359       |
| Gender (0=female; 1=male)            | 0.712          | 0.263 ***    | < 0.001 | 0.390                                 | 1.034       |
| Age (years)                          | 0.005          | 0.052        | 0.408   | - 0.007                               | 0.016       |
| BMI (kg/m <sup>2</sup> )             | 0.001          | 0.003        | 0.964   | - 0.028                               | 0.029       |
| Education (0=no; 1= academic degree) | 0.066          | 0.024        | 0.690   | - 0.258                               | 0.389       |

Model:  $R^2 = 0.130$ , Adjusted  $R^2 = 0.105$ . \*  $p < 0.050$ , \*\*  $p < 0.010$ , \*\*\*  $p < 0.001$ .

**Table S3.** The results of the linear regression analyses. The prediction of the expected emotions associated with the unhealthy product (fried potatoes and sausages) by the factors: UT belief, GHI, Food pleasure orientation, gender, age, BMI, and education (n = 262).

| Expected                             | Unstandardized | Standardized | 95.0% Confidence Interval for $\beta$ |             |             |
|--------------------------------------|----------------|--------------|---------------------------------------|-------------|-------------|
| <b>calmness_1</b>                    | $\beta$        | $\beta$      | Sig.                                  | Lower bound | Upper Bound |
| (Constant)                           | 0.858          |              | 0.323                                 | - 0.848     | 2.563       |
| UT belief                            | 0.204          | 0.171 **     | 0.008                                 | 0.054       | 0.354       |
| GHI                                  | - 0.078        | - 0.049      | 0.448                                 | - 0.280     | 0.124       |
| Food pleasure orientation            | 0.287          | 0.164 **     | 0.006                                 | 0.085       | 0.489       |
| Gender (0=female; 1=male)            | 0.810          | 0.232 ***    | < 0.001                               | 0.402       | 1.218       |
| Age (years)                          | 0.002          | 0.015        | 0.812                                 | - 0.013     | 0.016       |
| BMI (kg/m <sup>2</sup> )             | 0.020          | 0.067        | 0.268                                 | - 0.016     | 0.056       |
| Education (0=no; 1= academic degree) | - 0.316        | - 0.090      | 0.131                                 | - 0.726     | 0.095       |

Model:  $R^2 = 0.154$ , Adjusted  $R^2 = 0.131$ . \*  $p < 0.050$ , \*\*  $p < 0.010$ , \*\*\*  $p < 0.001$ .

| Expected                             | Unstandardized | Standardized | 95.0% Confidence Interval for $\beta$ |             |             |
|--------------------------------------|----------------|--------------|---------------------------------------|-------------|-------------|
| <b>boredom_1</b>                     | $\beta$        | $\beta$      | Sig.                                  | Lower bound | Upper Bound |
| (Constant)                           | 3.959          |              | < 0.001                               | 2.026       | 5.892       |
| UT belief                            | 0.059          | 0.046        | 0.493                                 | - 0.111     | 0.230       |
| GHI                                  | 0.245          | 0.144 *      | 0.036                                 | 0.017       | 0.474       |
| Food pleasure orientation            | - 0.190        | - 0.101      | 0.104                                 | - 0.419     | 0.039       |
| Gender (0=female; 1=male)            | - 0.265        | - 0.071      | 0.260                                 | - 0.728     | 0.198       |
| Age (years)                          | - 0.006        | - 0.044      | 0.504                                 | - 0.022     | 0.011       |
| BMI (kg/m <sup>2</sup> )             | - 0.030        | - 0.095      | 0.139                                 | - 0.071     | 0.010       |
| Education (0=no; 1= academic degree) | 0.444          | 0.118        | 0.061                                 | - 0.021     | 0.910       |

Model:  $R^2 = 0.061$ , Adjusted  $R^2 = 0.035$ . \*  $p < 0.050$ , \*\*  $p < 0.010$ , \*\*\*  $p < 0.001$ .

| Expected                             | Unstandardized | Standardized | 95.0% Confidence Interval for $\beta$ |             |             |
|--------------------------------------|----------------|--------------|---------------------------------------|-------------|-------------|
| <b>satisfaction_1</b>                | $\beta$        | $\beta$      | Sig.                                  | Lower bound | Upper Bound |
| (Constant)                           | 1.659          |              | 0.058                                 | - 0.055     | 3.374       |
| UT belief                            | 0.176          | 0.144 *      | 0.022                                 | 0.025       | 0.327       |
| GHI                                  | - 0.208        | - 0.128 *    | 0.045                                 | - 0.411     | - 0.005     |
| Food pleasure orientation            | 0.373          | 0.208 ***    | < 0.001                               | 0.170       | 0.576       |
| Gender (0=female; 1=male)            | 0.895          | 0.250 ***    | < 0.001                               | 0.484       | 1.305       |
| Age (years)                          | - 0.001        | - 0.009      | 0.883                                 | - 0.016     | 0.013       |
| BMI (kg/m <sup>2</sup> )             | 0.024          | 0.078        | 0.190                                 | - 0.012     | 0.060       |
| Education (0=no; 1= academic degree) | - 0.220        | - 0.061      | 0.294                                 | - 0.633     | 0.193       |

Model:  $R^2 = 0.188$ , Adjusted  $R^2 = 0.165$ . \*  $p < 0.050$ , \*\*  $p < 0.010$ , \*\*\*  $p < 0.001$ .

| Expected                             | Unstandardized | Standardized | 95.0% Confidence Interval for $\beta$ |             |             |
|--------------------------------------|----------------|--------------|---------------------------------------|-------------|-------------|
| <b>happy memories of childhood_1</b> | $\beta$        | $\beta$      | Sig.                                  | Lower bound | Upper Bound |
| (Constant)                           | - 0.361        |              | 0.700                                 | - 2.204     | 1.482       |
| UT belief                            | 0.256          | 0.199 **     | 0.002                                 | 0.093       | 0.418       |
| GHI                                  | 0.100          | 0.059        | 0.366                                 | - 0.118     | 0.318       |
| Food pleasure orientation            | 0.455          | 0.242 ***    | < 0.001                               | 0.237       | 0.674       |
| Gender (0=female; 1=male)            | 0.725          | 0.194 **     | 0.001                                 | 0.283       | 1.166       |
| Age (years)                          | - 0.002        | - 0.017      | 0.781                                 | - 0.018     | 0.013       |
| BMI (kg/m <sup>2</sup> )             | 0.021          | 0.066        | 0.278                                 | - 0.017     | 0.060       |
| Education (0=no; 1= academic degree) | 0.063          | 0.017        | 0.780                                 | - 0.380     | 0.507       |

Model:  $R^2 = 0.144$ , Adjusted  $R^2 = 0.121$ . \*  $p < 0.050$ , \*\*  $p < 0.010$ , \*\*\*  $p < 0.001$ .

| Expected                             | Unstandardized | Standardized |         | 95.0% Confidence Interval for $\beta$ |             |
|--------------------------------------|----------------|--------------|---------|---------------------------------------|-------------|
| <u>guilt_1</u>                       | $\beta$        | $\beta$      | Sig.    | Lower bound                           | Upper Bound |
| (Constant)                           | 1.031          |              | 0.294   | - 0.901                               | 2.964       |
| UT belief                            | 0.306          | 0.231 ***    | < 0.001 | 0.136                                 | 0.477       |
| GHI                                  | 0.399          | 0.227 ***    | < 0.001 | 0.170                                 | 0.627       |
| Food pleasure orientation            | - 0.038        | - 0.020      | 0.741   | - 0.267                               | 0.191       |
| Gender (0=female; 1=male)            | - 0.517        | - 0.133 *    | 0.029   | - 0.980                               | - 0.054     |
| Age (years)                          | - 0.025        | - 0.190 **   | 0.003   | - 0.041                               | - 0.009     |
| BMI (kg/m <sup>2</sup> )             | 0.030          | 0.090        | 0.146   | - 0.010                               | 0.070       |
| Education (0=no; 1= academic degree) | 0.380          | 0.098        | 0.109   | - 0.085                               | 0.845       |

Model:  $R^2 = 0.122$ , Adjusted  $R^2 = 0.098$ . \*  $p < 0.050$ , \*\*  $p < 0.010$ , \*\*\*  $p < 0.001$ .

| Expected                             | Unstandardized | Standardized |         | 95.0% Confidence Interval for $\beta$ |             |
|--------------------------------------|----------------|--------------|---------|---------------------------------------|-------------|
| <u>disgust_1</u>                     | $\beta$        | $\beta$      | Sig.    | Lower bound                           | Upper Bound |
| (Constant)                           | 2.329          |              | 0.015   | 0.465                                 | 4.193       |
| UT belief                            | 0.066          | 0.051        | 0.432   | - 0.099                               | 0.230       |
| GHI                                  | 0.506          | 0.296 ***    | < 0.001 | 0.285                                 | 0.727       |
| Food pleasure orientation            | - 0.173        | - 0.092      | 0.124   | - 0.394                               | 0.048       |
| Gender (0=female; 1=male)            | - 0.489        | - 0.130 *    | 0.032   | - 0.936                               | - 0.043     |
| Age (years)                          | - 0.024        | - 0.189 **   | 0.003   | - 0.040                               | - 0.008     |
| BMI (kg/m <sup>2</sup> )             | 0.003          | 0.008        | 0.892   | - 0.036                               | 0.042       |
| Education (0=no; 1= academic degree) | 0.366          | 0.097        | 0.110   | - 0.083                               | 0.815       |

Model:  $R^2 = 0.136$ , Adjusted  $R^2 = 0.112$ . \*  $p < 0.050$ , \*\*  $p < 0.010$ , \*\*\*  $p < 0.001$ .

| Expected                             | Unstandardized | Standardized |         | 95.0% Confidence Interval for $\beta$ |             |
|--------------------------------------|----------------|--------------|---------|---------------------------------------|-------------|
| <u>energy and activity_1</u>         | $\beta$        | $\beta$      | Sig.    | Lower bound                           | Upper Bound |
| (Constant)                           | 0.876          |              | 0.271   | - 0.689                               | 2.442       |
| UT belief                            | 0.253          | 0.228 ***    | < 0.001 | 0.115                                 | 0.391       |
| GHI                                  | - 0.102        | - 0.069      | 0.281   | - 0.287                               | 0.084       |
| Food pleasure orientation            | 0.343          | 0.211 ***    | < 0.001 | 0.157                                 | 0.528       |
| Gender (0=female; 1=male)            | 0.687          | 0.212 ***    | < 0.001 | 0.312                                 | 1.062       |
| Age (years)                          | 0.007          | 0.065        | 0.287   | - 0.006                               | 0.020       |
| BMI (kg/m <sup>2</sup> )             | - 0.003        | - 0.011      | 0.852   | - 0.036                               | 0.030       |
| Education (0=no; 1= academic degree) | - 0.127        | - 0.039      | 0.507   | - 0.504                               | 0.250       |

Model:  $R^2 = 0.175$ , Adjusted  $R^2 = 0.152$ . \*  $p < 0.050$ , \*\*  $p < 0.010$ , \*\*\*  $p < 0.001$ .



**Table S4.** Significant ( $p < 0.050$ ) interactions with UT belief when evaluating the expected attributes of the unhealthy product (fried potatoes and sausages) ( $n = 262$ ).

|                                               | t       | $\beta$   | Sig.  | 95.0% Confidence Interval for $\beta$ |             |
|-----------------------------------------------|---------|-----------|-------|---------------------------------------|-------------|
|                                               |         |           |       | Lower bound                           | Upper Bound |
| <b>Expected healthiness_1</b>                 |         |           |       |                                       |             |
| UT belief * BMI                               | - 2.230 | - 0.021 * | 0.027 | - 0.040                               | - 0.003     |
| <b>Expected protein content_1</b>             |         |           |       |                                       |             |
| UT belief * GHI                               | 2.079   | 0.105 *   | 0.039 | 0.006                                 | 0.204       |
| UT belief * Gender                            | 3.078   | 0.337 **  | 0.002 | 0.121                                 | 0.553       |
| <b>Expected calmness_1</b>                    |         |           |       |                                       |             |
| UT belief * Age                               | - 2.367 | -0.012 *  | 0.019 | -0.023                                | -0.002      |
| <b>Expected satisfaction_1</b>                |         |           |       |                                       |             |
| UT belief * GHI                               | 2.173   | 0.142 *   | 0.031 | 0.013                                 | 0.270       |
| <b>Expected happy memories of childhood_1</b> |         |           |       |                                       |             |
| UT belief * Food pleasure orientation         | - 2.040 | -0.145 *  | 0.042 | -0.286                                | -0.005      |
| <b>Expected guilt_1</b>                       |         |           |       |                                       |             |
| UT belief * GHI                               | - 3.051 | -0.216 ** | 0.003 | -0.355                                | -0.077      |
| <b>Expected energy and activity_1</b>         |         |           |       |                                       |             |
| UT belief * Age                               | - 3.213 | -0.015 ** | 0.001 | -0.025                                | -0.006      |

## Section S4

**The results of the linear regression analyses. The prediction of the expected attributes of the healthy product: vegetable lentil soup (n = 262).**

**Table S5.** The results of the linear regression analyses. The prediction of the expected tastiness, healthiness, and purchase intention of the healthy product (vegetable lentil soup) by the factors: UT belief, GHI, Food pleasure orientation, gender, age, BMI, and education (n = 262).

| Expected                             | Unstandardized | Standardized | 95.0% Confidence Interval for $\beta$ |             |             |
|--------------------------------------|----------------|--------------|---------------------------------------|-------------|-------------|
| tastiness_2                          | $\beta$        | $\beta$      | Sig.                                  | Lower bound | Upper Bound |
| (Constant)                           | 2.139          |              | 0.011                                 | 0.488       | 3.789       |
| UT belief                            | - 0.144        | - 0.126      | 0.053                                 | - 0.289     | 0.002       |
| GHI                                  | 0.211          | 0.140 *      | 0.035                                 | 0.015       | 0.406       |
| Food pleasure orientation            | 0.278          | 0.167 **     | 0.006                                 | 0.082       | 0.473       |
| Gender (0=female; 1=male)            | - 0.454        | - 0.137 *    | 0.024                                 | - 0.850     | - 0.059     |
| Age (years)                          | 0.005          | 0.043        | 0.497                                 | - 0.009     | 0.019       |
| BMI (kg/m <sup>2</sup> )             | 0.010          | 0.036        | 0.560                                 | - 0.024     | 0.045       |
| Education (0=no; 1= academic degree) | 0.116          | 0.035        | 0.567                                 | - 0.281     | 0.513       |

Model:  $R^2 = 0.126$ , Adjusted  $R^2 = 0.101$ . \*  $p < 0.050$ , \*\*  $p < 0.010$ , \*\*\*  $p < 0.001$ .

| Expected                             | Unstandardized | Standardized | 95.0% Confidence Interval for $\beta$ |             |             |
|--------------------------------------|----------------|--------------|---------------------------------------|-------------|-------------|
| healthiness_2                        | $\beta$        | $\beta$      | Sig.                                  | Lower bound | Upper Bound |
| (Constant)                           | 2.009          |              | 0.005                                 | 0.627       | 3.391       |
| UT belief                            | 0.070          | 0.075        | 0.257                                 | - 0.051     | 0.192       |
| GHI                                  | 0.108          | 0.088        | 0.193                                 | - 0.055     | 0.272       |
| Food pleasure orientation            | 0.324          | 0.237 ***    | < 0.001                               | 0.160       | 0.487       |
| Gender (0=female; 1=male)            | - 0.188        | - 0.069      | 0.264                                 | - 0.519     | 0.143       |
| Age (years)                          | 0.003          | 0.031        | 0.632                                 | - 0.009     | 0.014       |
| BMI (kg/m <sup>2</sup> )             | 0.008          | 0.032        | 0.608                                 | - 0.021     | 0.037       |
| Education (0=no; 1= academic degree) | 0.170          | 0.062        | 0.316                                 | - 0.163     | 0.502       |

Model:  $R^2 = 0.087$ , Adjusted  $R^2 = 0.062$ . \*  $p < 0.050$ , \*\*  $p < 0.010$ , \*\*\*  $p < 0.001$ .

| Expected                             | Unstandardized | Standardized | 95.0% Confidence Interval for $\beta$ |             |             |
|--------------------------------------|----------------|--------------|---------------------------------------|-------------|-------------|
| purchase intention_2                 | $\beta$        | $\beta$      | Sig.                                  | Lower bound | Upper Bound |
| (Constant)                           | 0.587          |              | 0.493                                 | - 1.097     | 2.272       |
| UT belief                            | 0.016          | 0.014        | 0.827                                 | - 0.132     | 0.165       |
| GHI                                  | 0.420          | 0.274 ***    | < 0.001                               | 0.221       | 0.619       |
| Food pleasure orientation            | 0.246          | 0.145 *      | 0.016                                 | 0.046       | 0.445       |
| Gender (0=female; 1=male)            | - 0.232        | - 0.069      | 0.257                                 | - 0.636     | 0.171       |
| Age (years)                          | 0.001          | 0.009        | 0.890                                 | - 0.013     | 0.015       |
| BMI (kg/m <sup>2</sup> )             | - 0.003        | - 0.011      | 0.862                                 | - 0.038     | 0.032       |
| Education (0=no; 1= academic degree) | 0.138          | 0.041        | 0.503                                 | - 0.267     | 0.543       |

Model:  $R^2 = 0.119$ , Adjusted  $R^2 = 0.095$ . \*  $p < 0.050$ , \*\*  $p < 0.010$ , \*\*\*  $p < 0.001$ .

**Table S6.** The results of the linear regression analyses. The prediction of the expected nutrient contents of the healthy product (vegetable lentil soup) by the factors: UT belief, GHI, Food pleasure orientation, gender, age, BMI, and education (n = 262).

| Expected                             | Unstandardized | Standardized | 95.0% Confidence Interval for $\beta$ |             |             |
|--------------------------------------|----------------|--------------|---------------------------------------|-------------|-------------|
| energy content_2                     | $\beta$        | $\beta$      | Sig.                                  | Lower bound | Upper Bound |
| (Constant)                           | 2.171          |              | 0.007                                 | 0.592       | 3.750       |
| UT belief                            | 0.026          | 0.026        | 0.709                                 | - 0.113     | 0.165       |
| GHI                                  | 0.160          | 0.118        | 0.092                                 | - 0.026     | 0.347       |
| Food pleasure orientation            | 0.092          | 0.061        | 0.336                                 | - 0.095     | 0.279       |
| Gender (0=female; 1=male)            | 0.098          | 0.033        | 0.611                                 | - 0.280     | 0.476       |
| Age (years)                          | - 0.002        | - 0.024      | 0.714                                 | - 0.016     | 0.011       |
| BMI (kg/m <sup>2</sup> )             | 0.008          | 0.031        | 0.635                                 | - 0.025     | 0.041       |
| Education (0=no; 1= academic degree) | - 0.216        | - 0.072      | 0.264                                 | - 0.596     | 0.164       |

Model:  $R^2 = 0.021$ , Adjusted  $R^2 = - 0.006$ . \*  $p < 0.050$ , \*\*  $p < 0.010$ , \*\*\*  $p < 0.001$ .

| Expected                             | Unstandardized | Standardized | 95.0% Confidence Interval for $\beta$ |             |             |
|--------------------------------------|----------------|--------------|---------------------------------------|-------------|-------------|
| fat content_2                        | $\beta$        | $\beta$      | Sig.                                  | Lower bound | Upper Bound |
| (Constant)                           | 1.448          |              | 0.022                                 | 0.210       | 2.687       |
| UT belief                            | 0.207          | 0.248 ***    | < 0.001                               | 0.098       | 0.316       |
| GHI                                  | 0.178          | 0.161 *      | 0.017                                 | 0.032       | 0.325       |
| Food pleasure orientation            | - 0.053        | - 0.044      | 0.474                                 | - 0.200     | 0.093       |
| Gender (0=female; 1=male)            | 0.212          | 0.087        | 0.161                                 | - 0.085     | 0.508       |
| Age (years)                          | - 0.012        | - 0.149 *    | 0.021                                 | - 0.023     | - 0.002     |
| BMI (kg/m <sup>2</sup> )             | 0.009          | 0.042        | 0.508                                 | - 0.017     | 0.035       |
| Education (0=no; 1= academic degree) | 0.114          | 0.046        | 0.453                                 | - 0.184     | 0.412       |

Model:  $R^2 = 0.090$ , Adjusted  $R^2 = 0.065$ . \*  $p < 0.050$ , \*\*  $p < 0.010$ , \*\*\*  $p < 0.001$ .

| Expected                             | Unstandardized | Standardized | 95.0% Confidence Interval for $\beta$ |             |             |
|--------------------------------------|----------------|--------------|---------------------------------------|-------------|-------------|
| salt content_2                       | $\beta$        | $\beta$      | Sig.                                  | Lower bound | Upper Bound |
| (Constant)                           | 2.183          |              | 0.001                                 | 0.881       | 3.485       |
| UT belief                            | 0.127          | 0.149 *      | 0.030                                 | 0.013       | 0.242       |
| GHI                                  | 0.170          | 0.150 *      | 0.030                                 | 0.016       | 0.324       |
| Food pleasure orientation            | - 0.080        | - 0.064      | 0.307                                 | - 0.234     | 0.074       |
| Gender (0=female; 1=male)            | 0.103          | 0.041        | 0.516                                 | - 0.209     | 0.415       |
| Age (years)                          | - 0.008        | - 0.098      | 0.138                                 | - 0.019     | 0.003       |
| BMI (kg/m <sup>2</sup> )             | 0.008          | 0.039        | 0.545                                 | - 0.019     | 0.036       |
| Education (0=no; 1= academic degree) | 0.104          | 0.042        | 0.512                                 | - 0.209     | 0.418       |

Model:  $R^2 = 0.041$ , Adjusted  $R^2 = 0.014$ . \*  $p < 0.050$ , \*\*  $p < 0.010$ , \*\*\*  $p < 0.001$ .

| Expected                             | Unstandardized | Standardized | 95.0% Confidence Interval for $\beta$ |             |             |
|--------------------------------------|----------------|--------------|---------------------------------------|-------------|-------------|
| protein content_2                    | $\beta$        | $\beta$      | Sig.                                  | Lower bound | Upper Bound |
| (Constant)                           | 1.612          |              | 0.036                                 | 0.105       | 3.119       |
| UT belief                            | 0.070          | 0.071        | 0.299                                 | - 0.063     | 0.203       |
| GHI                                  | 0.135          | 0.103        | 0.136                                 | - 0.043     | 0.314       |
| Food pleasure orientation            | 0.057          | 0.040        | 0.528                                 | - 0.121     | 0.236       |
| Gender (0=female; 1=male)            | - 0.078        | - 0.027      | 0.671                                 | - 0.439     | 0.283       |
| Age (years)                          | 0.012          | 0.119        | 0.072                                 | - 0.001     | 0.024       |
| BMI (kg/m <sup>2</sup> )             | 0.015          | 0.060        | 0.356                                 | - 0.017     | 0.046       |
| Education (0=no; 1= academic degree) | - 0.166        | - 0.057      | 0.368                                 | - 0.529     | 0.196       |

Model:  $R^2 = 0.038$ , Adjusted  $R^2 = 0.012$ . \*  $p < 0.050$ , \*\*  $p < 0.010$ , \*\*\*  $p < 0.001$ .

**Table S7.** The results of the linear regression analyses. The prediction of the expected emotions associated with the healthy product (vegetable lentil soup) by the factors: UT belief, GHI, Food pleasure orientation, gender, age, BMI, and education (n = 262).

| Expected                             | Unstandardized | Standardized |         | 95.0% Confidence Interval for $\beta$ |             |
|--------------------------------------|----------------|--------------|---------|---------------------------------------|-------------|
| <b>calmness_2</b>                    | $\beta$        | $\beta$      | Sig.    | Lower bound                           | Upper Bound |
| (Constant)                           | 1.564          |              | 0.060   | - 0.067                               | 3.194       |
| UT belief                            | - 0.078        | - 0.070      | 0.286   | - 0.221                               | 0.066       |
| GHI                                  | 0.205          | 0.140 *      | 0.037   | 0.012                                 | 0.398       |
| Food pleasure orientation            | 0.340          | 0.209 ***    | < 0.001 | 0.146                                 | 0.533       |
| Gender (0=female; 1=male)            | - 0.280        | - 0.086      | 0.159   | - 0.671                               | 0.110       |
| Age (years)                          | 0.000          | 0.000        | 0.999   | - 0.014                               | 0.014       |
| BMI (kg/m <sup>2</sup> )             | - 0.006        | - 0.021      | 0.736   | - 0.040                               | 0.028       |
| Education (0=no; 1= academic degree) | 0.220          | 0.068        | 0.270   | - 0.172                               | 0.613       |

Model:  $R^2 = 0.108$ , Adjusted  $R^2 = 0.083$ . \*  $p < 0.050$ , \*\*  $p < 0.010$ , \*\*\*  $p < 0.001$ .

| Expected                             | Unstandardized | Standardized |         | 95.0% Confidence Interval for $\beta$ |             |
|--------------------------------------|----------------|--------------|---------|---------------------------------------|-------------|
| <b>boredom_2</b>                     | $\beta$        | $\beta$      | Sig.    | Lower bound                           | Upper Bound |
| (Constant)                           | 3.390          |              | < 0.001 | 1.575                                 | 5.205       |
| UT belief                            | 0.241          | 0.195 **     | 0.003   | 0.081                                 | 0.401       |
| GHI                                  | - 0.102        | - 0.062      | 0.350   | - 0.317                               | 0.113       |
| Food pleasure orientation            | 0.005          | 0.002        | 0.967   | - 0.210                               | 0.220       |
| Gender (0=female; 1=male)            | 0.425          | 0.117        | 0.055   | - 0.010                               | 0.860       |
| Age (years)                          | - 0.019        | - 0.158 *    | 0.013   | - 0.035                               | - 0.004     |
| BMI (kg/m <sup>2</sup> )             | 0.012          | 0.040        | 0.521   | - 0.026                               | 0.050       |
| Education (0=no; 1= academic degree) | - 0.005        | - 0.001      | 0.982   | - 0.442                               | 0.432       |

Model:  $R^2 = 0.112$ , Adjusted  $R^2 = 0.087$ . \*  $p < 0.050$ , \*\*  $p < 0.010$ , \*\*\*  $p < 0.001$ .

| Expected                             | Unstandardized | Standardized |       | 95.0% Confidence Interval for $\beta$ |             |
|--------------------------------------|----------------|--------------|-------|---------------------------------------|-------------|
| <b>satisfaction_2</b>                | $\beta$        | $\beta$      | Sig.  | Lower bound                           | Upper Bound |
| (Constant)                           | 2.031          |              | 0.017 | 0.360                                 | 3.703       |
| UT belief                            | - 0.122        | - 0.108      | 0.104 | - 0.269                               | 0.025       |
| GHI                                  | 0.190          | 0.127        | 0.060 | - 0.008                               | 0.388       |
| Food pleasure orientation            | 0.217          | 0.131 *      | 0.032 | 0.019                                 | 0.415       |
| Gender (0=female; 1=male)            | - 0.323        | - 0.098      | 0.114 | - 0.723                               | 0.078       |
| Age (years)                          | 0.001          | 0.010        | 0.873 | - 0.013                               | 0.015       |
| BMI (kg/m <sup>2</sup> )             | 0.014          | 0.048        | 0.441 | - 0.021                               | 0.049       |
| Education (0=no; 1= academic degree) | 0.295          | 0.089        | 0.149 | - 0.107                               | 0.698       |

Model:  $R^2 = 0.095$ , Adjusted  $R^2 = 0.070$ . \*  $p < 0.050$ , \*\*  $p < 0.010$ , \*\*\*  $p < 0.001$ .

| Expected                             | Unstandardized | Standardized |       | 95.0% Confidence Interval for $\beta$ |             |
|--------------------------------------|----------------|--------------|-------|---------------------------------------|-------------|
| <b>happy memories of childhood_2</b> | $\beta$        | $\beta$      | Sig.  | Lower bound                           | Upper Bound |
| (Constant)                           | 1.557          |              | 0.062 | - 0.078                               | 3.191       |
| UT belief                            | 0.068          | 0.062        | 0.354 | - 0.076                               | 0.212       |
| GHI                                  | 0.132          | 0.091        | 0.182 | - 0.062                               | 0.325       |
| Food pleasure orientation            | 0.195          | 0.123 *      | 0.048 | 0.002                                 | 0.389       |
| Gender (0=female; 1=male)            | 0.311          | 0.098        | 0.119 | - 0.081                               | 0.702       |
| Age (years)                          | - 0.015        | - 0.140 *    | 0.033 | - 0.029                               | - 0.001     |
| BMI (kg/m <sup>2</sup> )             | - 0.021        | - 0.077      | 0.231 | - 0.055                               | 0.013       |
| Education (0=no; 1= academic degree) | 0.334          | 0.105        | 0.096 | - 0.060                               | 0.727       |

Model:  $R^2 = 0.064$ , Adjusted  $R^2 = 0.038$ . \*  $p < 0.050$ , \*\*  $p < 0.010$ , \*\*\*  $p < 0.001$ .

| Expected                             | Unstandardized | Standardized | 95.0% Confidence Interval for $\beta$ |                    |                    |
|--------------------------------------|----------------|--------------|---------------------------------------|--------------------|--------------------|
| <b>guilt_2</b>                       | $\beta$        | $\beta$      | <b>Sig.</b>                           | <b>Lower bound</b> | <b>Upper Bound</b> |
| (Constant)                           | 0.733          |              | 0.300                                 | - 0.658            | 2.125              |
| UT belief                            | 0.288          | 0.303 ***    | < 0.001                               | 0.166              | 0.411              |
| GHI                                  | 0.154          | 0.122        | 0.067                                 | - 0.011            | 0.319              |
| Food pleasure orientation            | - 0.039        | - 0.028      | 0.639                                 | - 0.204            | 0.125              |
| Gender (0=female; 1=male)            | 0.418          | 0.150 *      | 0.014                                 | 0.084              | 0.751              |
| Age (years)                          | 0.000          | - 0.002      | 0.980                                 | - 0.012            | 0.012              |
| BMI (kg/m <sup>2</sup> )             | - 0.012        | - 0.052      | 0.402                                 | - 0.042            | 0.017              |
| Education (0=no; 1= academic degree) | - 0.114        | - 0.041      | 0.502                                 | - 0.449            | 0.220              |

Model:  $R^2 = 0.116$ , Adjusted  $R^2 = 0.091$ . \*  $p < 0.050$ , \*\*  $p < 0.010$ , \*\*\*  $p < 0.001$ .

| Expected                             | Unstandardized | Standardized | 95.0% Confidence Interval for $\beta$ |                    |                    |
|--------------------------------------|----------------|--------------|---------------------------------------|--------------------|--------------------|
| <b>disgust_2</b>                     | $\beta$        | $\beta$      | <b>Sig.</b>                           | <b>Lower bound</b> | <b>Upper Bound</b> |
| (Constant)                           | 2.858          |              | 0.001                                 | 1.109              | 4.608              |
| UT belief                            | 0.258          | 0.212 **     | 0.001                                 | 0.104              | 0.412              |
| GHI                                  | - 0.064        | - 0.040      | 0.545                                 | - 0.271            | 0.143              |
| Food pleasure orientation            | - 0.035        | - 0.020      | 0.738                                 | - 0.242            | 0.172              |
| Gender (0=female; 1=male)            | 0.545          | 0.154 *      | 0.011                                 | 0.127              | 0.964              |
| Age (years)                          | - 0.023        | - 0.193 **   | 0.002                                 | - 0.038            | - 0.008            |
| BMI (kg/m <sup>2</sup> )             | 0.008          | 0.026        | 0.675                                 | - 0.029            | 0.044              |
| Education (0=no; 1= academic degree) | - 0.007        | - 0.002      | 0.974                                 | - 0.428            | 0.414              |

Model:  $R^2 = 0.141$ , Adjusted  $R^2 = 0.117$ . \*  $p < 0.050$ , \*\*  $p < 0.010$ , \*\*\*  $p < 0.001$ .

| Expected                             | Unstandardized | Standardized | 95.0% Confidence Interval for $\beta$ |                    |                    |
|--------------------------------------|----------------|--------------|---------------------------------------|--------------------|--------------------|
| <b>energy and activity_2</b>         | $\beta$        | $\beta$      | <b>Sig.</b>                           | <b>Lower bound</b> | <b>Upper Bound</b> |
| (Constant)                           | 1.791          |              | 0.031                                 | 0.161              | 3.420              |
| UT belief                            | - 0.042        | - 0.038      | 0.567                                 | - 0.185            | 0.102              |
| GHI                                  | 0.252          | 0.174 *      | 0.011                                 | 0.059              | 0.444              |
| Food pleasure orientation            | 0.189          | 0.118        | 0.055                                 | - 0.004            | 0.382              |
| Gender (0=female; 1=male)            | - 0.346        | - 0.109      | 0.082                                 | - 0.736            | 0.044              |
| Age (years)                          | - 0.005        | - 0.051      | 0.434                                 | - 0.019            | 0.008              |
| BMI (kg/m <sup>2</sup> )             | 0.020          | 0.075        | 0.239                                 | - 0.014            | 0.055              |
| Education (0=no; 1= academic degree) | 0.089          | 0.028        | 0.654                                 | - 0.303            | 0.482              |

Model:  $R^2 = 0.075$ , Adjusted  $R^2 = 0.049$ . \*  $p < 0.050$ , \*\*  $p < 0.010$ , \*\*\*  $p < 0.001$ .

**Table S8.** Significant ( $p < 0.050$ ) interactions with UT belief when evaluating the expected attributes of the healthy product (vegetable lentil soup) ( $n = 262$ ).

|                                               | t       | $\beta$    | Sig.  | 95.0% Confidence Interval for $\beta$ |             |
|-----------------------------------------------|---------|------------|-------|---------------------------------------|-------------|
|                                               |         |            |       | Lower bound                           | Upper Bound |
| <b>Expected tastiness_2</b>                   |         |            |       |                                       |             |
| UT belief * Age                               | - 2.395 | - 0.012 *  | 0.017 | - 0.022                               | - 0.002     |
| UT belief * Education                         | - 2.004 | - 0.276 *  | 0.046 | - 0.548                               | - 0.005     |
| <b>Expected healthiness_2</b>                 |         |            |       |                                       |             |
| UT belief * Age                               | - 2.588 | - 0.011 *  | 0.010 | - 0.019                               | - 0.003     |
| <b>Expected purchase intention_2</b>          |         |            |       |                                       |             |
| UT belief * Age                               | - 2.607 | - 0.013 *  | 0.010 | - 0.023                               | - 0.003     |
| <b>Expected fat content_2</b>                 |         |            |       |                                       |             |
| UT belief * Age                               | - 2.961 | - 0.011 ** | 0.003 | - 0.018                               | - 0.004     |
| UT belief * Gender                            | 2.677   | 0.271 **   | 0.008 | 0.072                                 | 0.470       |
| UT belief * BMI                               | - 2.077 | - 0.018 *  | 0.039 | - 0.035                               | - 0.001     |
| <b>Expected salt content_2</b>                |         |            |       |                                       |             |
| UT belief * Age                               | - 2.462 | - 0.009 *  | 0.014 | - 0.017                               | - 0.002     |
| UT belief * BMI                               | - 2.104 | - 0.019 *  | 0.036 | - 0.037                               | - 0.001     |
| <b>Expected protein content_2</b>             |         |            |       |                                       |             |
| UT belief * Age                               | - 3.306 | - 0.014 ** | 0.001 | - 0.023                               | - 0.006     |
| UT belief * Food pleasure orientation         | - 2.739 | - 0.158 ** | 0.007 | - 0.271                               | - 0.044     |
| <b>Expected calmness_2</b>                    |         |            |       |                                       |             |
| UT belief * GHI                               | 1.992   | 0.120 *    | 0.047 | 0.001                                 | 0.238       |
| <b>Expected satisfaction_2</b>                |         |            |       |                                       |             |
| UT belief * Age                               | - 2.911 | - 0.014 ** | 0.004 | - 0.024                               | - 0.005     |
| <b>Expected happy memories of childhood_2</b> |         |            |       |                                       |             |
| UT belief * Age                               | - 2.839 | - 0.014 ** | 0.005 | - 0.023                               | - 0.004     |
| <b>Expected guilt_2</b>                       |         |            |       |                                       |             |
| UT belief * Food pleasure orientation         | - 2.900 | - 0.155 ** | 0.004 | - 0.260                               | - 0.050     |
| <b>Expected energy and activity_2</b>         |         |            |       |                                       |             |
| UT belief * Age                               | - 2.229 | - 0.011 *  | 0.027 | - 0.020                               | - 0.001     |
